# Supplementary material for: Evaluation of Risk Perception and Risk-Comparison Information Regarding Dietary Radionuclides after the 2011 Fukushima Nuclear Power Plant Accident
Source: PLOS journal article supplement (doi:10.1371/journal.pone.0165594), 2016-11-01
Supplement: S1 (10.1371/journal.pone.0165594.s001) [file journal.pone.0165594.s001]

**S1 Table.**

|                                                                | Subjective understanding<br>(≥ 4) | Objective understanding<br>("about 1/1000 of that of a traffic accident") | Perceived greatness of risk (≥ 4) | Perceived accuracy of information (≥ 4) | Backlash against information (= 1) | Risk acceptance ("do not mind" or "acceptable") |
|----------------------------------------------------------------|-----------------------------------|---------------------------------------------------------------------------|-----------------------------------|-----------------------------------------|------------------------------------|-------------------------------------------------|
| Fukushima                                                      |                                   |                                                                           |                                   |                                         |                                    |                                                 |
| A1. Radiation dose only                                        | 23.6%                             | 39.6%                                                                     | 32.5%                             | 26.8%                                   | 8.0%                               | 53.6%                                           |
| A2. Food standard dose                                         | 32.4%                             | 32.7%                                                                     | 32.2%                             | 28.9%                                   | 6.8%                               | 50.8%                                           |
| A6. Natural radiation dose                                     | 34.9%                             | 35.1%                                                                     | 30.3%                             | 25.7%                                   | 8.6%                               | 54.1%                                           |
| A10. Smoking risk                                              | 42.0%                             | 39.0%                                                                     | 26.2%                             | 27.2%                                   | 5.4%                               | 60.8%                                           |
| Tokyo                                                          |                                   |                                                                           |                                   |                                         |                                    |                                                 |
| A1. Radiation dose only                                        | 16.6%                             | 31.9%                                                                     | 16.3%                             | 17.5%                                   | 3.9%                               | 44.6%                                           |
| A2. Food standard dose                                         | 31.6%                             | 33.1%                                                                     | 17.5%                             | 22.0%                                   | 3.0%                               | 44.0%                                           |
| A3. Results for 100 mSv                                        | 36.9%                             | 29.3%                                                                     | 17.4%                             | 19.2%                                   | 3.8%                               | 49.8%                                           |
| A4. 1960s dose                                                 | 33.3%                             | 26.1%                                                                     | 27.3%                             | 22.7%                                   | 4.5%                               | 42.1%                                           |
| A5. Doses in other prefectures                                 | 31.7%                             | 27.6%                                                                     | 25.4%                             | 23.2%                                   | 2.9%                               | 46.0%                                           |
| A6. Natural radiation dose                                     | 30.4%                             | 34.0%                                                                     | 22.5%                             | 21.3%                                   | 4.3%                               | 50.5%                                           |
| A8. Airplane dose                                              | 35.1%                             | 32.6%                                                                     | 20.0%                             | 23.7%                                   | 4.6%                               | 48.6%                                           |
| A9. Arsenic risk                                               | 34.4%                             | 29.7%                                                                     | 20.9%                             | 20.3%                                   | 5.6%                               | 48.4%                                           |
| A10. Smoking risk                                              | 38.0%                             | 32.4%                                                                     | 21.5%                             | 23.4%                                   | 4.4%                               | 44.5%                                           |
| B1. Cancer risk from radiation                                 | 32.1%                             | 33.9%                                                                     | 19.9%                             | 19.9%                                   | 3.7%                               | 51.1%                                           |
| B7. Cancer risk from radiation and total cancer mortality rate | 31.5%                             | 38.0%                                                                     | 21.3%                             | 20.7%                                   | 4.9%                               | 48.1%                                           |
| B9. Cancer risk from radiation and arsenic                     | 35.2%                             | 34.6%                                                                     | 26.5%                             | 19.0%                                   | 5.0%                               | 44.9%                                           |
| B10. Cancer risk from radiation and smoking risk               | 37.3%                             | 42.3%                                                                     | 17.9%                             | 21.6%                                   | 3.4%                               | 48.6%                                           |
| C1. LLE from radiation                                         | 29.2%                             | 33.6%                                                                     | 22.0%                             | 21.1%                                   | 4.4%                               | 45.0%                                           |
| C10. LLE from radiation and smoking risk                       | 33.4%                             | 27.9%                                                                     | 22.7%                             | 20.6%                                   | 5.8%                               | 47.2%                                           |
| Osaka                                                          |                                   |                                                                           |                                   |                                         |                                    |                                                 |
| A1. Radiation dose only                                        | 15.4%                             | 31.2%                                                                     | 11.4%                             | 17.0%                                   | 4.0%                               | 44.1%                                           |
| A2. Food standard dose                                         | 31.1%                             | 32.3%                                                                     | 12.1%                             | 18.3%                                   | 2.2%                               | 47.2%                                           |
| A3. Results for 100 mSv                                        | 39.3%                             | 30.4%                                                                     | 13.7%                             | 20.5%                                   | 3.9%                               | 50.3%                                           |
| A4. 1960s dose                                                 | 27.5%                             | 35.6%                                                                     | 10.6%                             | 17.8%                                   | 2.7%                               | 43.8%                                           |
| A5. Doses in other prefectures                                 | 26.7%                             | 30.1%                                                                     | 14.3%                             | 16.4%                                   | 4.0%                               | 43.2%                                           |
| A6. Natural radiation dose                                     | 34.0%                             | 38.1%                                                                     | 8.5%                              | 19.2%                                   | 3.1%                               | 47.5%                                           |
| A8. Airplane dose                                              | 35.1%                             | 29.8%                                                                     | 9.7%                              | 16.6%                                   | 3.1%                               | 43.3%                                           |
| A9. Arsenic risk                                               | 29.7%                             | 30.6%                                                                     | 14.5%                             | 20.3%                                   | 1.5%                               | 47.6%                                           |
| A10. Smoking risk                                              | 38.7%                             | 35.3%                                                                     | 15.6%                             | 19.9%                                   | 2.5%                               | 46.6%                                           |
