# Supplementary material for: Evaluation of Risk Perception and Risk-Comparison Information Regarding Dietary Radionuclides after the 2011 Fukushima Nuclear Power Plant Accident
Source: PLOS journal article supplement (doi:10.1371/journal.pone.0165594), 2016-11-01
Supplement: S3 (10.1371/journal.pone.0165594.s003) [file journal.pone.0165594.s003]

**S3 Table.**

|                                    | Subjective understanding | Objective understanding | Perceived magnitude of risk | Perceived accuracy of information | Backlash against information | Risk acceptance     |
|------------------------------------|--------------------------|-------------------------|-----------------------------|-----------------------------------|------------------------------|---------------------|
| Nakadori=Ref                       | 1                        | 1                       | 1                           | 1                                 | 1                            | 1                   |
| Hamadori                           | 1.09<br>(0.81–1.46)      | 1.06<br>(0.79–1.42)     | 1.03<br>(0.76–1.40)         | 1.16<br>(0.84–1.60)               | 1.16<br>(0.69–1.96)          | 1.12<br>(0.84–1.49) |
| Aizu                               | 0.91<br>(0.64–1.30)      | 1.19<br>(0.85–1.66)     | 0.92<br>(0.63–1.32)         | 1.22<br>(0.85–1.76)               | 0.93<br>(0.47–1.84)          | 0.94<br>(0.67–1.30) |
| Not evacuated=Ref                  | 1                        | 1                       | 1                           | 1                                 | 1                            | 1                   |
| Evacuated                          | 1.02<br>(0.74–1.41)      | 0.73<br>(0.53–1.00)     | 2.27<br>(1.66–3.10)         | 0.75<br>(0.53–1.08)               | 1.86<br>(1.12–3.08)          | 0.71<br>(0.52–0.96) |
| Men=Ref                            | 1                        | 1                       | 1                           | 1                                 | 1                            | 1                   |
| Women                              | 0.86<br>(0.65–1.13)      | 0.54<br>(0.41–0.70)     | 0.89<br>(0.67–1.18)         | 1.03<br>(0.77–1.40)               | 0.46<br>(0.27–0.79)          | 1.26<br>(0.97–1.64) |
| 20s=Ref                            | 1                        | 1                       | 1                           | 1                                 | 1                            | 1                   |
| 30s                                | 1.54<br>(0.97–2.46)      | 1.34<br>(0.86–2.08)     | 0.72<br>(0.45–1.17)         | 1.65<br>(0.99–2.74)               | 0.37<br>(0.17–0.82)          | 1.38<br>(0.90–2.12) |
| 40s                                | 1.42<br>(0.90–2.24)      | 1.27<br>(0.83–1.96)     | 0.89<br>(0.56–1.41)         | 1.62<br>(0.98–2.67)               | 0.62<br>(0.30–1.28)          | 1.12<br>(0.74–1.70) |
| 50s                                | 1.64<br>(1.01–2.66)      | 1.01<br>(0.64–1.60)     | 0.96<br>(0.59–1.55)         | 1.38<br>(0.82–2.35)               | 0.45<br>(0.20–1.00)          | 1.18<br>(0.76–1.83) |
| 60s                                | 0.99<br>(0.57–1.75)      | 0.93<br>(0.55–1.58)     | 1.12<br>(0.64–1.96)         | 1.19<br>(0.65–2.18)               | 0.45<br>(0.18–1.16)          | 1.18<br>(0.70–1.97) |
| Company employees etc.=Ref         | 1                        | 1                       | 1                           | 1                                 | 1                            | 1                   |
| Self-employed etc.                 | 0.90<br>(0.59–1.36)      | 1.26<br>(0.84–1.88)     | 0.90<br>(0.58–1.38)         | 0.93<br>(0.59–1.46)               | 1.14<br>(0.55–2.34)          | 1.44<br>(0.95–2.18) |
| Other                              | 0.93<br>(0.71–1.23)      | 1.17<br>(0.90–1.53)     | 0.74<br>(0.55–0.98)         | 0.71<br>(0.53–0.96)               | 1.04<br>(0.62–1.74)          | 0.85<br>(0.66–1.11) |
| Absence of spouse=Ref              | 1                        | 1                       | 1                           | 1                                 | 1                            | 1                   |
| Presence of spouse                 | 1.12<br>(0.80–1.56)      | 1.02<br>(0.74–1.41)     | 1.23<br>(0.87–1.72)         | 0.99<br>(0.69–1.43)               | 1.01<br>(0.55–1.86)          | 1.06<br>(0.77–1.45) |
| Absence of children=Ref            | 1                        | 1                       | 1                           | 1                                 | 1                            | 1                   |
| Presence of children               | 0.85<br>(0.61–1.19)      | 1.03<br>(0.75–1.43)     | 0.97<br>(0.69–1.36)         | 1.11<br>(0.77–1.60)               | 1.04<br>(0.56–1.92)          | 0.92<br>(0.67–1.26) |
| Absence of grandchildren=Ref       | 1                        | 1                       | 1                           | 1                                 | 1                            | 1                   |
| Presence of grandchildren          | 1.92<br>(1.26–2.91)      | 0.91<br>(0.60–1.39)     | 1.22<br>(0.80–1.87)         | 1.38<br>(0.88–2.18)               | 1.17<br>(0.53–2.56)          | 1.07<br>(0.71–1.61) |
| Junior or high-school graduate=Ref | 1                        | 1                       | 1                           | 1                                 | 1                            | 1                   |
| University etc. graduate etc.      | 1.22<br>(0.95–1.57)      | 1.25<br>(0.98–1.60)     | 0.94<br>(0.73–1.21)         | 1.14<br>(0.87–1.50)               | 1.01<br>(0.64–1.60)          | 1.18<br>(0.93–1.50) |
| Humanities course=Ref              | 1                        | 1                       | 1                           | 1                                 | 1                            | 1                   |
| Neither                            | 0.61<br>(0.43–0.85)      | 0.90<br>(0.66–1.24)     | 1.05<br>(0.76–1.45)         | 0.61<br>(0.42–0.88)               | 1.35<br>(0.76–2.40)          | 0.92<br>(0.68–1.24) |
| Science course                     | 1.14<br>(0.88–1.49)      | 1.16<br>(0.89–1.50)     | 0.83<br>(0.63–1.11)         | 0.88<br>(0.66–1.17)               | 1.26<br>(0.77–2.07)          | 1.05<br>(0.81–1.35) |
| Do not smoke=Ref                   | 1                        | 1                       | 1                           | 1                                 | 1                            | 1                   |
| Do smoke                           | 1.10<br>(0.84–1.46)      | 0.93<br>(0.71–1.22)     | 1.26<br>(0.95–1.67)         | 0.91<br>(0.67–1.23)               | 1.11<br>(0.68–1.80)          | 1.11<br>(0.85–1.45) |

|                                                        |                     |                        |                        |                        |                        |                       |
|--------------------------------------------------------|---------------------|------------------------|------------------------|------------------------|------------------------|-----------------------|
| TV and radio: do not trust=Ref                         | 1                   | 1                      | 1                      | 1                      | 1                      | 1                     |
| TV and radio: trust                                    | 0.85<br>(0.62–1.19) | 1.12<br>(0.81–1.55)    | 1.04<br>(0.72–1.49)    | 1.20<br>(0.86–1.68)    | 0.79<br>(0.38–1.66)    | 1.07<br>(0.78–1.49)   |
| Newspapers: do not trust=Ref                           | 1                   | 1                      | 1                      | 1                      | 1                      | 1                     |
| Newspapers: trust                                      | 1<br>(0.73–1.37)    | 0.93<br>(0.68–1.27)    | 1.38<br>(0.98–1.95)    | 0.95<br>(0.69–1.30)    | 0.46<br>(0.22–0.98)    | * 1.09<br>(0.81–1.48) |
| Central government: do not trust=Ref                   | 1                   | 1                      | 1                      | 1                      | 1                      | 1                     |
| Central government: trust                              | 1.60<br>(1.16–2.22) | ** 1.82<br>(1.32–2.52) | ** 0.48<br>(0.31–0.72) | ** 2.24<br>(1.61–3.10) | ** 0.45<br>(0.16–1.23) | 1.84<br>(1.30–2.61)   |
| Direct information from researchers: do not trust=Ref  | 1                   | 1                      | 1                      | 1                      | 1                      | 1                     |
| Direct information from researchers: trust             | 1.28<br>(0.93–1.77) | 1.25<br>(0.91–1.72)    | 0.74<br>(0.51–1.07)    | 1.39<br>(1.00–1.93)    | * 0.97<br>(0.47–1.99)  | 1.27<br>(0.92–1.77)   |
| Direct information from friends: do not trust=Ref      | 1                   | 1                      | 1                      | 1                      | 1                      | 1                     |
| Direct information from friends: trust                 | 0.98<br>(0.63–1.52) | 0.63<br>(0.40–1.00)    | 1.54<br>(0.96–2.45)    | 0.86<br>(0.54–1.35)    | 1.71<br>(0.77–3.83)    | 0.85<br>(0.55–1.31)   |
| On-line information from researchers: do not trust=Ref | 1                   | 1                      | 1                      | 1                      | 1                      | 1                     |
| On-line information from researchers: trust            | 1.21<br>(0.87–1.68) | 1.21<br>(0.87–1.68)    | 0.98<br>(0.67–1.42)    | 0.88<br>(0.62–1.24)    | 0.86<br>(0.42–1.75)    | 0.96<br>(0.69–1.34)   |
| On-line information from others: do not trust=Ref      | 1                   | 1                      | 1                      | 1                      | 1                      | 1                     |
| On-line information from others: trust                 | 0.72<br>(0.44–1.16) | 0.91<br>(0.57–1.47)    | 2.41<br>(1.48–3.91)    | ** 0.52<br>(0.30–0.89) | * 2.16<br>(0.96–4.83)  | 0.64<br>(0.41–1.02)   |
| Trust any of above=Ref                                 | 1                   | 1                      | 1                      | 1                      | 1                      | 1                     |
| Do not trust any of above                              | 0.62<br>(0.43–0.90) | * 1.09<br>(0.76–1.55)  | 1.89<br>(1.28–2.78)    | ** 0.30<br>(0.20–0.46) | ** 1.74<br>(0.86–3.51) | 0.47<br>(0.33–0.67)   |
| A1. Radiation dose only=Ref                            | 1                   | 1                      | 1                      | 1                      | 1                      | 1                     |
| A2. Food standard dose                                 | 1.56<br>(1.11–2.19) | * 0.74<br>(0.54–1.02)  | 0.94<br>(0.68–1.30)    | 1.12<br>(0.79–1.59)    | 0.80<br>(0.44–1.43)    | 0.89<br>(0.66–1.21)   |
| A6. Natural radiation dose                             | 1.84<br>(1.31–2.58) | ** 0.82<br>(0.60–1.12) | 0.87<br>(0.62–1.20)    | 1<br>(0.70–1.42)       | 1.02<br>(0.59–1.77)    | 1.07<br>(0.79–1.46)   |
| A10. Smoking risk                                      | 2.44<br>(1.75–3.42) | ** 0.99<br>(0.73–1.35) | 0.70<br>(0.50–0.98)    | * 1.02<br>(0.72–1.46)  | 0.63<br>(0.34–1.17)    | 1.35<br>(0.99–1.84)   |
