# Supplementary material for: Evaluation of Risk Perception and Risk-Comparison Information Regarding Dietary Radionuclides after the 2011 Fukushima Nuclear Power Plant Accident
Source: PLOS journal article supplement (doi:10.1371/journal.pone.0165594), 2016-11-01
Supplement: S4 (10.1371/journal.pone.0165594.s004) [file journal.pone.0165594.s004]

**S4 Table.**

|                                             | Subjective understanding |    | Objective understanding |    | Perceived magnitude of risk | Perceived accuracy of information | Backlash against information | Risk acceptance     |    |
|---------------------------------------------|--------------------------|----|-------------------------|----|-----------------------------|-----------------------------------|------------------------------|---------------------|----|
| Men=Ref                                     | 1                        |    | 1                       |    | 1                           | 1                                 | 1                            | 1                   |    |
| Women                                       | 0.85<br>(0.74–0.98)      | *  | 0.64<br>(0.55–0.73)     | ** | 1.08<br>(0.92–1.27)         | 0.91<br>(0.77–1.07)               | 0.74<br>(0.53–1.02)          | 1.04<br>(0.91–1.19) |    |
| 20s=Ref                                     | 1                        |    | 1                       |    | 1                           | 1                                 | 1                            | 1                   |    |
| 30s                                         | 1<br>(0.81–1.23)         |    | 1.38<br>(1.12–1.70)     | ** | 0.82<br>(0.65–1.03)         | 0.91<br>(0.72–1.16)               | 0.72<br>(0.43–1.20)          | 1.18<br>(0.97–1.44) |    |
| 40s                                         | 0.87<br>(0.71–1.08)      |    | 1.49<br>(1.20–1.83)     | ** | 0.73<br>(0.58–0.92)         | 0.92<br>(0.73–1.17)               | 1.11<br>(0.69–1.81)          | 1.22<br>(1.00–1.49) | *  |
| 50s                                         | 1.05<br>(0.83–1.31)      |    | 1.68<br>(1.34–2.11)     | ** | 0.66<br>(0.51–0.85)         | 0.83<br>(0.63–1.08)               | 1.38<br>(0.83–2.29)          | 1.49<br>(1.20–1.85) | ** |
| 60s                                         | 0.94<br>(0.73–1.22)      |    | 1.40<br>(1.08–1.81)     | *  | 0.64<br>(0.48–0.86)         | 0.96<br>(0.72–1.29)               | 1.23<br>(0.69–2.20)          | 1.54<br>(1.21–1.96) | ** |
| Company employees etc=Ref                   | 1                        |    | 1                       |    | 1                           | 1                                 | 1                            | 1                   |    |
| Self-employed etc                           | 1.04<br>(0.80–1.34)      |    | 0.91<br>(0.71–1.17)     |    | 1.37<br>(1.05–1.80)         | 0.73<br>(0.53–1.01)               | 1.62<br>(1.01–2.59)          | 0.82<br>(0.64–1.05) |    |
| Other                                       | 0.99<br>(0.85–1.15)      |    | 1.04<br>(0.90–1.21)     |    | 0.86<br>(0.73–1.02)         | 0.97<br>(0.82–1.16)               | 0.87<br>(0.61–1.23)          | 0.92<br>(0.80–1.06) |    |
| Absence of spouse=Ref                       | 1                        |    | 1                       |    | 1                           | 1                                 | 1                            | 1                   |    |
| Presence of spouse                          | 1.12<br>(0.95–1.32)      |    | 1.01<br>(0.86–1.19)     |    | 1.14<br>(0.94–1.37)         | 0.95<br>(0.79–1.16)               | 1.02<br>(0.71–1.48)          | 1.07<br>(0.92–1.25) |    |
| Absence of children=Ref                     | 1                        |    | 1                       |    | 1                           | 1                                 | 1                            | 1                   |    |
| Presence of children                        | 1.11<br>(0.93–1.32)      |    | 0.79<br>(0.67–0.94)     | ** | 1.20<br>(0.99–1.46)         | 1.16<br>(0.94–1.41)               | 0.83<br>(0.56–1.23)          | 0.85<br>(0.72–1.00) | *  |
| Absence of grandchildren=Ref                | 1                        |    | 1                       |    | 1                           | 1                                 | 1                            | 1                   |    |
| Presence of grandchildren                   | 0.86<br>(0.66–1.11)      |    | 1<br>(0.77–1.29)        |    | 1.21<br>(0.91–1.62)         | 1.14<br>(0.85–1.52)               | 1.29<br>(0.73–2.28)          | 0.84<br>(0.66–1.07) |    |
| Junior or high-school graduate=Ref          | 1                        |    | 1                       |    | 1                           | 1                                 | 1                            | 1                   |    |
| University etc. graduate                    | 1.20<br>(1.02–1.42)      | *  | 1.07<br>(0.91–1.25)     |    | 1.16<br>(0.96–1.39)         | 1.27<br>(1.05–1.54)               | 0.87<br>(0.61–1.25)          | 1.10<br>(0.95–1.28) |    |
| Humanities course=Ref                       | 1                        |    | 1                       |    | 1                           | 1                                 | 1                            | 1                   |    |
| Neither                                     | 0.74<br>(0.61–0.91)      | ** | 1.06<br>(0.88–1.27)     |    | 0.77<br>(0.62–0.96)         | 0.82<br>(0.65–1.03)               | 0.73<br>(0.47–1.14)          | 0.80<br>(0.67–0.95) | *  |
| Science course                              | 1.37<br>(1.18–1.58)      | ** | 1.28<br>(1.10–1.47)     | ** | 0.96<br>(0.81–1.14)         | 1.10<br>(0.94–1.31)               | 0.91<br>(0.65–1.28)          | 1.15<br>(1.00–1.32) |    |
| Do not smoke=Ref                            | 1                        |    | 1                       |    | 1                           | 1                                 | 1                            | 1                   |    |
| Do smoke                                    | 1.11<br>(0.95–1.30)      |    | 0.81<br>(0.69–0.95)     | ** | 1.32<br>(1.11–1.57)         | 1.05<br>(0.87–1.26)               | 0.83<br>(0.58–1.20)          | 1.34<br>(1.16–1.56) | ** |
| TV and radio: do not trust=Ref              | 1                        |    | 1                       |    | 1                           | 1                                 | 1                            | 1                   |    |
| TV and radio: trust                         | 0.94<br>(0.79–1.11)      |    | 0.85<br>(0.72–1.01)     |    | 0.90<br>(0.74–1.09)         | 1.13<br>(0.94–1.36)               | 0.69<br>(0.43–1.11)          | 1.08<br>(0.92–1.27) |    |
| Newspapers: do not trust=Ref                | 1                        |    | 1                       |    | 1                           | 1                                 | 1                            | 1                   |    |
| Newspapers: trust                           | 1.08<br>(0.92–1.27)      |    | 1.14<br>(0.96–1.34)     |    | 1.02<br>(0.85–1.24)         | 1.19<br>(0.99–1.42)               | 0.96<br>(0.60–1.56)          | 1.06<br>(0.91–1.24) |    |
| Central government: do not trust=Ref        | 1                        |    | 1                       |    | 1                           | 1                                 | 1                            | 1                   |    |
| Central government: trust                   | 1.53<br>(1.30–1.81)      | ** | 1.49<br>(1.25–1.76)     | ** | 0.69<br>(0.56–0.85)         | 2<br>(1.68–2.39)                  | 0.36<br>(0.18–0.69)          | 2.18<br>(1.84–2.59) | ** |
| Direct information from researchers: do not | 1                        |    | 1                       |    | 1                           | 1                                 | 1                            | 1                   |    |

|                                                                |                     |    |                     |    |                     |                     |                     |                     |                     |
|----------------------------------------------------------------|---------------------|----|---------------------|----|---------------------|---------------------|---------------------|---------------------|---------------------|
| trust=Ref                                                      |                     |    |                     |    |                     |                     |                     |                     |                     |
| Direct information from researchers: trust                     | 1.39<br>(1.17–1.65) | ** | 1.26<br>(1.05–1.50) | *  | 0.98<br>(0.80–1.20) | 1.13<br>(0.93–1.37) | 1.28<br>(0.83–1.98) | 0.96<br>(0.81–1.14) |                     |
| Direct information from friends: do not trust=Ref              | 1                   |    | 1                   |    | 1                   | 1                   | 1                   | 1                   |                     |
| Direct information from friends: trust                         | 0.94<br>(0.75–1.18) |    | 0.79<br>(0.62–1.00) | *  | 1.54<br>(1.21–1.96) | **                  | 0.83<br>(0.64–1.08) | 2.91<br>(1.86–4.54) | **                  |
| On-line information from researchers: do not trust=Ref         | 1                   |    | 1                   |    | 1                   | 1                   | 1                   | 1                   |                     |
| On-line information from researchers: trust                    | 1.30<br>(1.09–1.56) | ** | 1.26<br>(1.05–1.51) | *  | 1.07<br>(0.87–1.32) | 1.13<br>(0.93–1.38) | 1.47<br>(0.92–2.34) | 1.28<br>(1.08–1.53) | **                  |
| On-line information from others: do not trust=Ref              | 1                   |    | 1                   |    | 1                   | 1                   | 1                   | 1                   |                     |
| On-line information from others: trust                         | 1.26<br>(1.00–1.59) | *  | 0.95<br>(0.74–1.20) |    | 1.72<br>(1.34–2.21) | **                  | 1.01<br>(0.77–1.31) | 2.24<br>(1.39–3.62) | **                  |
| Trust any of above=Ref                                         | 1                   |    | 1                   |    | 1                   | 1                   | 1                   | 1                   |                     |
| Do not trust any of above                                      | 0.72<br>(0.60–0.88) | ** | 1.21<br>(1.00–1.46) |    | 0.98<br>(0.79–1.22) | 0.52<br>(0.41–0.66) | **                  | 2.81<br>(1.76–4.46) | **                  |
| A1. Radiation dose only=Ref                                    | 1                   |    | 1                   |    | 1                   | 1                   | 1                   | 1                   |                     |
| A2. Food standard dose                                         | 2.67<br>(1.83–3.91) | ** | 1.07<br>(0.77–1.49) |    | 1.13<br>(0.75–1.71) | 1.49<br>(1.00–2.22) | *                   | 0.74<br>(0.32–1.74) | 1.04<br>(0.76–1.43) |
| A3. Results for 100 mSv                                        | 3.10<br>(2.12–4.52) | ** | 0.89<br>(0.64–1.26) |    | 1.06<br>(0.70–1.61) | 1.13<br>(0.75–1.70) |                     | 0.94<br>(0.41–2.12) | 1.22<br>(0.89–1.68) |
| A4. 1960s dose                                                 | 2.70<br>(1.85–3.94) | ** | 0.76<br>(0.54–1.06) |    | 1.89<br>(1.29–2.77) | **                  | 1.49<br>(1.00–2.21) | 1<br>(0.46–2.17)    | 0.94<br>(0.68–1.30) |
| A5. Doses in other prefectures                                 | 2.52<br>(1.72–3.69) | ** | 0.82<br>(0.58–1.15) |    | 1.83<br>(1.24–2.70) | **                  | 1.46<br>(0.98–2.17) | 0.72<br>(0.30–1.74) | 1.03<br>(0.75–1.43) |
| A6. Natural radiation dose                                     | 2.35<br>(1.60–3.44) | ** | 1.10<br>(0.79–1.53) |    | 1.54<br>(1.04–2.29) | *                   | 1.30<br>(0.87–1.94) | 1.04<br>(0.47–2.28) | 1.30<br>(0.95–1.78) |
| A8. Airplane dose                                              | 2.97<br>(2.03–4.33) | ** | 1.04<br>(0.75–1.45) |    | 1.30<br>(0.87–1.94) | 1.57<br>(1.06–2.32) | *                   | 1.13<br>(0.52–2.45) | 1.26<br>(0.91–1.73) |
| A9. Arsenic risk                                               | 2.91<br>(1.99–4.25) | ** | 0.89<br>(0.64–1.25) |    | 1.40<br>(0.94–2.10) | 1.27<br>(0.85–1.90) |                     | 1.41<br>(0.67–2.96) | 1.23<br>(0.89–1.69) |
| A10. Smoking risk                                              | 3.48<br>(2.39–5.07) | ** | 1.06<br>(0.76–1.48) |    | 1.46<br>(0.98–2.17) | 1.51<br>(1.02–2.24) | *                   | 1.19<br>(0.54–2.61) | 1.00<br>(0.73–1.38) |
| B1. Cancer risk from radiation                                 | 2.61<br>(1.78–3.82) | ** | 1.12<br>(0.80–1.56) |    | 1.30<br>(0.87–1.94) | 1.21<br>(0.81–1.81) |                     | 0.91<br>(0.40–2.05) | 1.36<br>(0.99–1.86) |
| B7. Cancer risk from radiation and total cancer mortality rate | 2.45<br>(1.67–3.58) | ** | 1.33<br>(0.95–1.84) |    | 1.44<br>(0.96–2.14) | 1.23<br>(0.82–1.84) |                     | 1.31<br>(0.61–2.81) | 1.15<br>(0.84–1.58) |
| B9. Cancer risk from radiation and arsenic                     | 2.96<br>(2.03–4.33) | ** | 1.17<br>(0.84–1.63) |    | 1.85<br>(1.26–2.73) | **                  | 1.16<br>(0.77–1.75) | 1.25<br>(0.58–2.69) | 1.04<br>(0.75–1.43) |
| B10. Cancer risk from radiation and smoking risk               | 3.27<br>(2.24–4.77) | ** | 1.58<br>(1.14–2.20) | ** | 1.16<br>(0.77–1.76) | 1.33<br>(0.89–1.99) |                     | 0.89<br>(0.39–2.04) | 1.20<br>(0.87–1.65) |
| C1. LLE from radiation                                         | 2.25<br>(1.53–3.31) | ** | 1.08<br>(0.78–1.51) |    | 1.46<br>(0.98–2.18) | 1.37<br>(0.92–2.05) |                     | 1.00<br>(0.45–2.18) | 1.07<br>(0.78–1.48) |
| C10. LLE from radiation and smoking risk                       | 2.79<br>(1.91–4.08) | ** | 0.84<br>(0.60–1.18) |    | 1.56<br>(1.05–2.32) | *                   | 1.26<br>(0.84–1.88) | 1.51<br>(0.72–3.17) | 1.12<br>(0.82–1.54) |
